# Supplementary material
Source: PubMed Central journal article supplement (PMC6506892)
Supplement: jamadermatol-e185905-s003.pdf [file jamadermatol-e185905-s003.pdf]

## Data Sharing Statement

Vieyra-Garcia. Evaluation of Low-Dose, Low-Frequency Oral Psoralen-UV-A Treatment With or Without Maintenance on Early-Stage Mycosis Fungoides. *JAMA Dermatol*. Published March 20, 2019.  
10.1001/jamadermatol.2018.5905

### Data

**Data available:** Yes

**Data types:** Deidentified participant data

**How to access data:** For accessing deidentified participant data please contact Professor Peter Wolf [peter.wolf@medunigraz.at](mailto:peter.wolf@medunigraz.at)

**When available:** With publication

### Supporting Documents

**Document types:** None

### Additional Information

**Who can access the data:** Anyone requesting the data

**Types of analyses:** for any purpose or for a specified purpose

**Mechanisms of data availability:** with a signed data access agreement
